# Supplementary material for: New generation of DNA-based immunotherapy induces a potent immune response and increases the survival in different tumor models
Source: PubMed Central journal article supplement — J Immunother Cancer. 2021 Apr 1;9(4):e001243. doi: 10.1136/jitc-2020-001243 (PMC8021892; doi:10.1136/jitc-2020-001243), 2021-04-01
Supplement: jitc-2020-001243supp001.pdf [file jitc-2020-001243supp001.pdf]

## **A new generation of DNA-based immunotherapy induces a potent immune response and increases the survival in different tumor models**

Alessandra Lopes<sup>a,§</sup>, Chiara Bastiancich<sup>a,b,§</sup>, Mathilde Bausart<sup>a</sup>, Sophie Ligot<sup>a</sup>, Laure Lambricht<sup>a</sup>, Kevin Vanvarenberg<sup>a</sup>, Bernard Ucakar<sup>a</sup>, Bernard Gallez<sup>c</sup>, Véronique Pr at<sup>a,\*</sup>, Ga elle Vandermeulen<sup>a,\*</sup>

### **Supplementary methods**

#### ***Cell lines***

B16F10-OVA cells, which stably expresses OVA, were cultured in MEM supplemented with GlutaMAX, while GL261 were cultured in DMEM. Both media were supplemented with 10 % FBS, 100 µg/mL streptomycin, and 100 U/mL penicillin (Gibco, Life Technologies, USA). Cells were subcultured in 75 cm<sup>2</sup> culture flasks (Corning® T-75, Sigma-Aldrich, USA) and incubated at 37°C and 5% CO<sub>2</sub>. B16F10-OVA cells were obtained from Professor Johan Grooten (University of Ghent, Belgium). GL261 were provided by Professor Sophie Lucas (de Duve Institute, University of Louvain, Belgium).

#### ***Animals***

Six-week-old C57BL/6NRj female mice were obtained from Janvier Labs (France) and housed in an air conditioned animal facility with ad libitum access to food and water. Temperature and humidity were monitored daily. For subcutaneous tumor implantation and electroporation, the mice were anaesthetized with a 150 to 200 µL intraperitoneal injection of 10 mg/mL ketamine and 1 mg/mL xylazine. For cranial surgeries, the ketamine/xylazine dose was 100 mg/kg and 13 mg/kg, respectively. Animals were sacrificed when the tumor volume was greater than 1500 mm<sup>3</sup> (subcutaneous models) or when they reached the end points (appearance or behaviour changes and clinical signs of distress: lack of grooming, paralysis, arched back, lack of movement plus 10% body weight loss and/or 20% body weight loss). Transgenic OT-I and OT-II mice were obtained from the University of Ghent (Belgium).

#### ***Subcutaneous tumor implantation and tumor measurement***

At day 0, a total of  $1 \times 10^5$  B16F10-OVA cells diluted in 100  $\mu$ L PBS were injected subcutaneously into the right flanks of C57BL/6 mice. A total of  $2 \times 10^6$  GL261 cells diluted in 100  $\mu$ L of PBS were injected subcutaneously into the right flank of C57BL/6 mice. The tumor cells were inoculated before the plasmid treatment. Tumor size (for the subcutaneous models) was measured three times a week with an electronic digital calliper. Tumor volume was calculated as the length  $\times$  width  $\times$  height (in  $\text{mm}^3$ ).

#### ***RT-PCR analysis***

GL261 cells were analyzed by RT-PCR to verify the presence of TRP2 and gp100 antigens. Total RNA was isolated using TRIzol reagent (Thermo Fisher, Waltham, Massachusetts) and phenol separation. The quality and quantity of RNA were evaluated using a nanospectrophotometer (NanoDrop 2000, Thermo Fisher, Waltham, Massachusetts). One microgram of RNA was reverse transcribed using a first-strand synthesis system (SuperScript<sup>TM</sup>, Thermo Fisher, Waltham, Massachusetts) and oligo(dT) primers according to the supplier's protocol. The resulting cDNA was used as template for 30 cycles of PCR amplification. The PCR products were subjected to electrophoresis on a SYBR Safe (Thermo Fisher Scientific) -stained 1.5% agarose gel.

#### ***Magnetic Resonance Imaging***

MRI was performed for all mice included in the study before the surgical resection of the tumor. MRI was performed using a 11.7 T Bruker Biospec MRI system (Bruker, Germany) equipped with a 1 H quadrature transmit/receive surface cryoprobe after anesthetizing animals with isoflurane mixed with air (2.5% for induction, 1% for maintenance). Tumor was visualized using rapid acquisition with relaxation enhancement (RARE) sequence (repetition time = 2500 ms; effective echo time = 30 ms; RARE factor = 8; field of view = 2 x 2 cm; matrix 256 x 256; Slice thickness = 0.3 mm; 25 contiguous slices were acquired, N average = 4).

#### ***Surgical resection of the GL261 tumor mass***

At day 17 post-tumor inoculation, the tumor mass was surgically removed by using the biopsy-punch resection technique. Briefly, animals were anaesthetized with ketamine/xylazine and immobilized in a stereotactic frame. An 8 mm incision was made in the midline along the previous surgical scar and a 2.1 mm diameter circular cranial window was created around the previous burr hole using fine tip tweezers (Dumont, Switzerland) to expose the brain. A 2 mm diameter biopsy punch (Kai Medical, Germany) was then inserted 3 mm deep and twisted for 15 s to cut the brain region surrounding the tumor. Once withdrawn, the tumor and brain tissues were aspirated using a diaphragm vacuum pump (Vaccubrand GBMH+CO KG, Germany) connected to a Pasteur pipette and a 200 µl tip. Residual blood was removed from the surgical cavity using a haemostatic triangle (Fine Science Tools, Germany). The cranial window was then sealed with a 4 x 4 mm square piece of Neuro-Patch® (Aesculap, Germany) impregnated with a reconstituted fibrin hydrogel (25 mg/mL fibrin, 10 IU/mL thrombin, equal volumes; Baxter Innovations, Austria).<sup>1</sup>

#### ***Hematoxylin and eosin staining***

At the first signs of pain and discomfort, tumor-bearing mice were sacrificed, and the brain was removed, fixed in 10% formalin solution (Merck, Germany) and embedded in paraffin days. 28 Then, it was sectioned (10 µm) using a MICROM 17M325 microtome (Thermo Fischer Scientific, USA) and collected on super-frost plus glass slide. For the histological analysis, the slides were stained with hematoxylin and eosin (H/E). Samples were processed using a Sakura DRS 601 automated slide stainer (Sakura Finetek Europe, The Netherlands).

**Supplementary figures and tables****Supplementary Figure 1**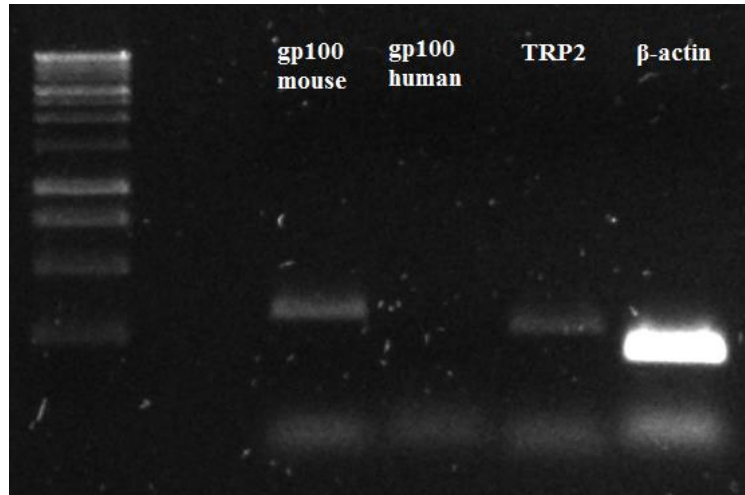

*Supplementary Figure 1 – RT-PCR performed to verify the expression of murine gp100 and TRP2 antigens by the GL261 cells. Human gp100 and b-actin served as a negative control and as a housekeeping gene (positive control), respectively.*

## Supplementary Figure 2

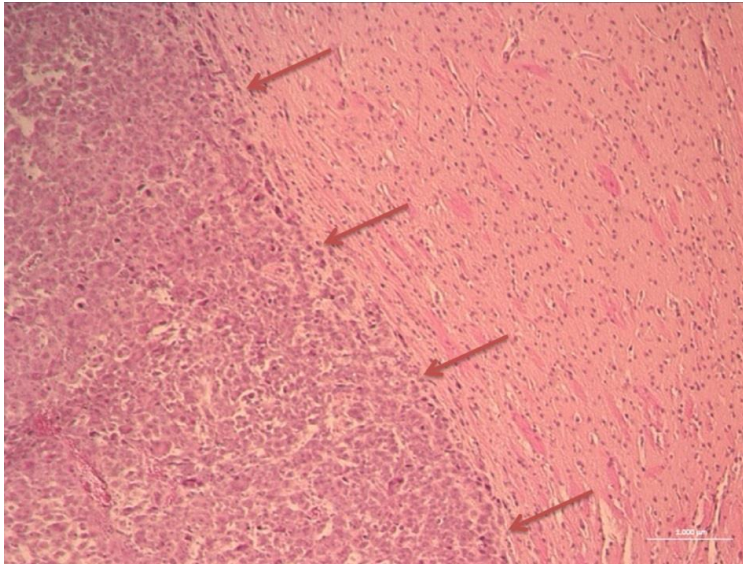

Supplementary Figure 2 – Representative H/E image of the brain/tumor of an untreated (naïve) mouse sacrificed due to signs of discomfort and pain. The red arrows indicate the infiltrative margins between the tumor (left) and the brain (right).

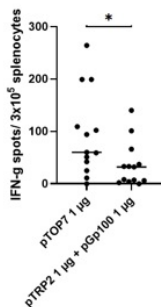

Supplementary Figure3. Comparison of pTOP and conventional plasmids. The production of IFN by splenocytes stimulated by the TRP2 peptide was assessed by ELISpot. Mice were immunized by 1 g of pTOP7 or pTRP2 and pGp100 (pVAX plasmids encoding TRP2 or Gp100) at day 0, 7 and 14 and sacrificed at day 21.

Supplementary table 1

Supplementary table 1 – List of primers used for the study.

| Gene         | Primer sequence (5' → 3')                                    | Amplicon length |
|--------------|--------------------------------------------------------------|-----------------|
| IL-6         | For – CCGGAGAGGAGACTTCACAG<br>Rev – TCCACGATTTCCAGAGAAC      | 102 bp          |
| IL-12        | For – GGAAGCACGGCAGCAGAATA<br>Rev – AACTTGAGGGAGAAGTAGGAATGG | 180 bp          |
| CCL2         | For - GATGCAGTTAACGCCCACT<br>Rev - CCCATTCTTCTTGGGGTCA       | 172 bp          |
| TRP2         | For – CCAGGATGACCGTGAGCAA<br>Rev – GGCAGTCAGGGAATGGAT        | 171 bp          |
| Murine-gp100 | For – GGAGCTTCCTTCCCGTGCTT<br>Rev – GCTCCATTGATGATGGTGT      | 321 bp          |
| Human-gp100  | For – ATAGGTGCTTTGCTGGCTGT<br>Rev – ACCTGCCATCTGGCAATAC      | 263 bp          |
| b-actin      | For – ACTCCTATGTGGGTGACGAG<br>Rev – CATCTTTTCACGGTTGGCCTTAG  | 206 bp          |

References

1. Bianco, J, Bastiancich, C, Joudiou, N, Gallez, B, des Rieux, A, and Danhier, F (2017). Novel model of orthotopic U-87 MG glioblastoma resection in athymic nude mice. *Journal of Neuroscience Methods* **284**: 96-102.
